# Supplementary material for: Heterometrus spinifer: An Untapped Source of Anti-Tumor Molecules
Source: PubMed Central journal article supplement (PMC7408436; doi:10.3390/biology9070150), 2020-07-02
Supplement: biology-09-00150-s001.pdf [file biology-09-00150-s001.pdf]

**Supplementary Table S1: Molecules identified from the conditioned media prepared from (A) HSG12 (*P. aeruginosa*) and (B) HSG16 (*B. subtilis*) isolated from gastrointestinal tract of *H. spinifer* through LC-MS. The conditioned media prepared was subjected to chloroform extraction and the extracts were subject to LC-MS analysis. The spectre generated were searched in the METLIN library in order to reveal the potential identity of the detected molecules. To assess whether those identified molecules had previously reported biological activity, they were searched in the SciFinder database.**

| (A)                                                                                                                                                                                      |        |            |                                                                                                                                                                                                     |
|------------------------------------------------------------------------------------------------------------------------------------------------------------------------------------------|--------|------------|-----------------------------------------------------------------------------------------------------------------------------------------------------------------------------------------------------|
| HSG12 ( <i>P. aeruginosa</i> ) Conditioned Media                                                                                                                                         |        |            |                                                                                                                                                                                                     |
| Compound                                                                                                                                                                                 | Mass   | <i>m/z</i> | Reported Activity                                                                                                                                                                                   |
| <b>Glucoheptonic acid</b><br>Molecular formula: C <sub>7</sub> H <sub>14</sub> O <sub>8</sub><br>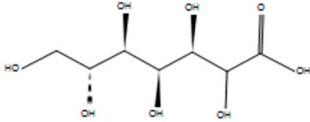       | 226.07 | 225.06     | No reported biological activity                                                                                                                                                                     |
| <b>Citric acid</b><br>Molecular formula: C <sub>6</sub> H <sub>8</sub> O <sub>7</sub><br>              | 192.03 | 191.02     | *Weak organic acid involved in citric acid cycle during respiration.<br>*Used as flavouring and preservative in food and beverages.<br>*Used a chelating agent.<br>*Antimicrobial activity [37,51]. |
| <b>Erythro-1,4-lactone</b><br>Molecular formula: C <sub>4</sub> H <sub>6</sub> O <sub>4</sub><br>     | 118.03 | 117.02     | *No reported biological activity                                                                                                                                                                    |
| <b>U-0126</b><br>Molecular formula: C <sub>18</sub> H <sub>16</sub> N <sub>6</sub> S <sub>2</sub><br> | 380.09 | 379.08     | *MAPK/ERK kinase activity<br>*Anticancer activity<br>(Antiproliferative effect) [32,33]<br>*Antiviral activity [47,48].<br>*Neuroprotective effect [43,44].                                         |
| <b>3-Hydroxymorphinan</b><br>Molecular formula: C <sub>16</sub> H <sub>21</sub> NO<br>                | 243.16 | 242.16     | *A psychoactive drug of the morphinan family<br>*Neuroprotective agent for the treatment of Parkinson's disease (PD) [42,45].                                                                       |
| <b>(10S)-Juvenile hormone III acid diol</b><br>Molecular formula: C <sub>15</sub> H <sub>26</sub> O <sub>4</sub>                                                                         | 270.18 | 305.15     | *No reported biological activity                                                                                                                                                                    |

|    |                                                                                                                                                                                                                                       |        |        |                                                                                                          |
|----|---------------------------------------------------------------------------------------------------------------------------------------------------------------------------------------------------------------------------------------|--------|--------|----------------------------------------------------------------------------------------------------------|
|    | 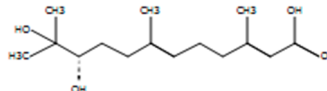                                                                                                                                                     |        |        |                                                                                                          |
|    | <b>1,8-Naphthyridine-3-carboxylic acid, 1-ethyl-1,4-dihydro-7-hydroxy-4-oxo-glucuronide</b><br>Molecular formula: C <sub>17</sub> H <sub>18</sub> N <sub>2</sub> O <sub>10</sub>                                                      |        |        |                                                                                                          |
| 7  |                                                                                                                                                      | 410.10 | 409.09 | *No reported biological activity                                                                         |
|    | <b>3-oxo-tridecanoic acid</b><br>Molecular formula: C <sub>13</sub> H <sub>24</sub> O <sub>3</sub>                                                                                                                                    |        |        |                                                                                                          |
| 8  |                                                                                                                                                      | 228.17 | 227.17 | *No reported biological activity                                                                         |
|    | <b>Dextromethorphan</b><br>Molecular formula: C <sub>18</sub> H <sub>25</sub> NO                                                                                                                                                      |        |        |                                                                                                          |
| 9  |                                                                                                                                                     | 271.19 | 270.19 | * Antitussive activity [49].<br>*Antibacterial activity [38,40,41].<br>*Anti-inflammatory activity [40]. |
|    | <b>Proglumide</b><br>Molecular formula: C <sub>18</sub> H <sub>26</sub> N <sub>2</sub> O <sub>4</sub>                                                                                                                                 |        |        |                                                                                                          |
| 10 |                                                                                                                                                    | 334.19 | 333.18 | *Anticancer activity [34,52].<br>*Acts as gastric antagonist binding to gastrin receptors [53].          |
|    | <b>2-chloropalmitaldehyde</b><br>Molecular formula: C <sub>16</sub> H <sub>31</sub> ClO                                                                                                                                               |        |        |                                                                                                          |
| 11 |                                                                                                                                                    | 274.21 | 309.18 | *No reported biological activity                                                                         |
|    | <b>3-(2,4-Cyclopentadien-1-ylidene)pregn-4-en-20-one</b><br>Molecular formula: C <sub>26</sub> H <sub>34</sub> O                                                                                                                      |        |        |                                                                                                          |
| 12 |                                                                                                                                                    | 362.26 | 397.23 | *No reported biological activity                                                                         |
|    | <b>(6R)-vitamin D3 6,19-(4-phenyl-1,2,4-triazoline-3,5-dione) adduct / (6R)-cholecalciferol 6,19-(4-phenyl-1,2,4-triazoline-3,5-dione) adduct</b><br>Molecular formula: C <sub>35</sub> H <sub>49</sub> N <sub>3</sub> O <sub>3</sub> |        |        |                                                                                                          |
| 13 |                                                                                                                                                                                                                                       | 559.38 | 594.35 | *No reported biological activity                                                                         |

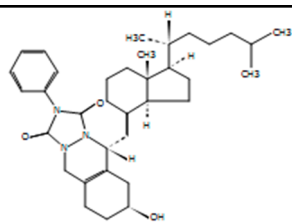**Trolamine**Molecular formula: C<sub>6</sub>H<sub>15</sub>NO<sub>3</sub>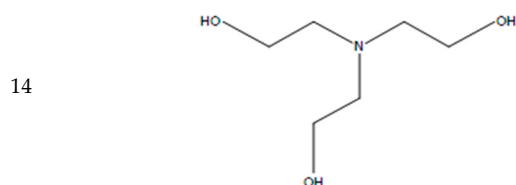

149.11 150.11 \*No reported biological activity

**Thiodiglycol**Molecular formula: C<sub>4</sub>H<sub>10</sub>O<sub>2</sub>S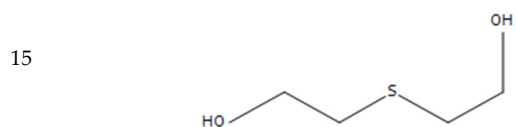

122.04 123.05 \*No reported biological activity

**1-(1-Pyrrolidinyl)-2-propanone**Molecular formula: C<sub>7</sub>H<sub>13</sub>NO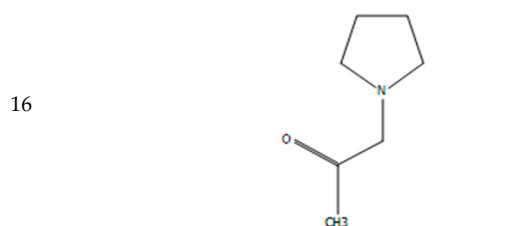

127.10 128.11 \*No reported biological activity

**CMN 131**Molecular formula: C<sub>7</sub>H<sub>8</sub>N<sub>2</sub>S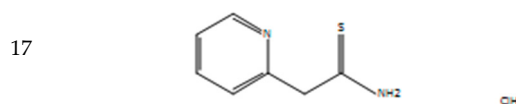

152.04 170.07 \*No reported biological activity

**5-Acetyl-2,3-dihydro-1,4-thiazine**Molecular formula: C<sub>6</sub>H<sub>9</sub>NO<sub>2</sub>S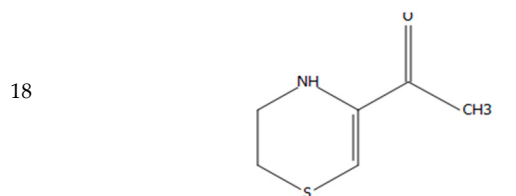

143.04 144.05 \*Flavoring agent [54].

**(2R,4R)-2-phenylthiazolidine-4-carboxylic acid**Molecular formula: C<sub>10</sub>H<sub>11</sub>NO<sub>2</sub>S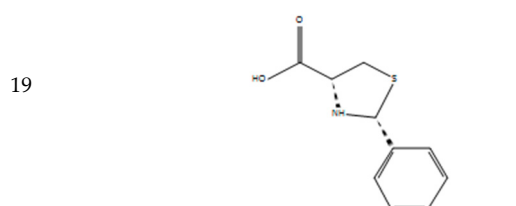

209.05 210.06 \*No reported biological activity

|    |                                                                                                                                                                                                                   |        |        |                                                                                           |
|----|-------------------------------------------------------------------------------------------------------------------------------------------------------------------------------------------------------------------|--------|--------|-------------------------------------------------------------------------------------------|
| 20 | <p style="text-align: center;"><b>Xylylcarb</b><br/>Molecular formula: C<sub>10</sub>H<sub>13</sub>NO<sub>2</sub></p> 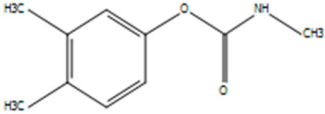           | 179.09 | 180.10 | *Used in insecticide.                                                                     |
| 21 | <p style="text-align: center;"><b>2,6-Nonadien-1-ol</b><br/>Molecular formula: C<sub>9</sub>H<sub>16</sub>O</p>                  | 140.12 | 158.15 | *Antiperspirant and deodorant compositions (United States Patent 9730878)                 |
| 22 | <p style="text-align: center;"><b>2-Hydroxyethylclavam</b><br/>Molecular formula: C<sub>7</sub>H<sub>11</sub>NO<sub>3</sub></p>  | 157.07 | 158.08 | *No reported biological activity                                                          |
| 23 | <p style="text-align: center;"><b>Levorphanol</b><br/>Molecular formula: C<sub>17</sub>H<sub>23</sub>NO</p>                    | 257.18 | 258.19 | * Levorphanol mimics the actions of morphine<br>*Analgesic activity (pain reliever) [55]. |
| 24 | <p style="text-align: center;"><b>D-Vacciniin</b><br/>Molecular formula: C<sub>13</sub>H<sub>16</sub>O<sub>7</sub></p>         | 284.09 | 323.05 | *No reported biological activity                                                          |
| 25 | <p style="text-align: center;"><b>Bifemelane</b><br/>Molecular formula: C<sub>18</sub>H<sub>23</sub>NO</p>                     | 269.18 | 270.19 | * Antidepressant activity [56].<br>*Neuroprotective effect [46].                          |
| 26 | <p style="text-align: center;"><b>Prosopinine</b><br/>Molecular formula: C<sub>16</sub>H<sub>33</sub>NO<sub>3</sub></p>        | 287.25 | 288.25 | *No reported biological activity                                                          |
| 27 | <p style="text-align: center;"><b>Anacyclin</b></p>                                                                                                                                                               | 271.19 | 272.20 | *No reported biological activity                                                          |

|                                                     |                                                                                                 |                                                                                     |               |                                                                            |
|-----------------------------------------------------|-------------------------------------------------------------------------------------------------|-------------------------------------------------------------------------------------|---------------|----------------------------------------------------------------------------|
|                                                     | Molecular formula: C <sub>18</sub> H <sub>25</sub> NO                                           |                                                                                     |               |                                                                            |
|                                                     | 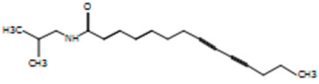               |                                                                                     |               |                                                                            |
| 28                                                  | <b>Spirasine I</b><br>Molecular formula: C <sub>22</sub> H <sub>29</sub> NO <sub>3</sub>        |    | 355.22 373.25 | *No reported biological activity                                           |
| 29                                                  | <b>Benzphetamine</b><br>Molecular formula: C <sub>17</sub> H <sub>21</sub> N                    |    | 239.17 278.13 | *Method of weight management (U.S Patent: 61711413)                        |
| 30                                                  | <b>Buprofezin</b><br>Molecular formula: C <sub>16</sub> H <sub>23</sub> N <sub>3</sub> OS       |   | 305.16 306.16 | *Insecticide [57].                                                         |
| 31                                                  | <b>Arachidoyl glycine</b><br>Molecular formula: C <sub>22</sub> H <sub>43</sub> NO <sub>3</sub> |  | 369.32 370.33 | *No reported biological activity                                           |
| (B)                                                 |                                                                                                 |                                                                                     |               |                                                                            |
| <b>HSG16 (<i>B. subtilis</i>) conditioned media</b> |                                                                                                 |                                                                                     |               |                                                                            |
|                                                     | <b>Compound</b>                                                                                 | <b>Mass</b>                                                                         | <b>m/z</b>    | <b>Reported activity</b>                                                   |
| 1                                                   | <b>Propionylglycine</b><br>Molecular formula: C <sub>5</sub> H <sub>9</sub> NO <sub>3</sub>     |  | 131.06 132.07 | *No reported biological activity                                           |
| 2                                                   | <b>6-Aminonicotinamide</b><br>Molecular formula: C <sub>6</sub> H <sub>7</sub> N <sub>3</sub> O |  | 137.06 138.07 | *Inhibitor of 6-phosphogluconate (6PG), inhibiting the pentose cycle [58]. |

|   |                                                                                                                                                                                                                         |        |        |                                                     |
|---|-------------------------------------------------------------------------------------------------------------------------------------------------------------------------------------------------------------------------|--------|--------|-----------------------------------------------------|
| 3 | <p style="text-align: center;"><b>Fibrin</b><br/>Molecular formula: C<sub>5</sub>H<sub>11</sub>N<sub>3</sub>O<sub>2</sub></p> 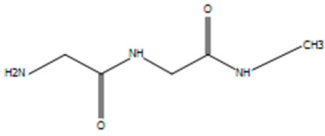         | 145.08 | 146.09 | * A protein involved in blood clotting [59].        |
| 4 | <p style="text-align: center;"><b>Thiodiglycol</b><br/>Molecular formula: C<sub>4</sub>H<sub>10</sub>O<sub>2</sub>S</p>                | 122.04 | 123.05 | *No reported biological activity                    |
| 5 | <p style="text-align: center;"><b>Pyroglutamic acid</b><br/>Molecular formula: C<sub>5</sub>H<sub>7</sub>NO<sub>3</sub></p>            | 129.04 | 130.05 | *An amino acid, derivative of L-glutamic acid [60]. |
| 6 | <p style="text-align: center;"><b>N-Hydroxy-L-phenylalanine</b><br/>Molecular formula: C<sub>9</sub>H<sub>11</sub>NO<sub>3</sub></p>  | 181.07 | 182.08 | *No reported biological activity                    |
| 7 | <p style="text-align: center;"><b>N-(2-Methylpropyl)acetamide</b><br/>Molecular formula: C<sub>6</sub>H<sub>13</sub>NO</p>           | 115.10 | 138.09 | *No reported biological activity                    |
| 8 | <p style="text-align: center;"><b>5-Acetyl-2,3-dihydro-1,4-thiazine</b><br/>Molecular formula: C<sub>6</sub>H<sub>9</sub>NOS</p>     | 143.04 | 144.05 | *Flavoring agent [54].                              |
| 9 | <p style="text-align: center;"><b>Pyrrolidinecarboxaldehyde</b><br/>Molecular formula: C<sub>5</sub>H<sub>9</sub>NO</p>              | 99.07  | 100.08 | *No reported biological activity                    |

|    |                                                                                                                                                                                                                   |        |        |                                                                                                     |
|----|-------------------------------------------------------------------------------------------------------------------------------------------------------------------------------------------------------------------|--------|--------|-----------------------------------------------------------------------------------------------------|
| 10 | <p><b>N-methyl arachidonoyl amine</b><br/>Molecular formula: C<sub>21</sub>H<sub>35</sub>NO</p> 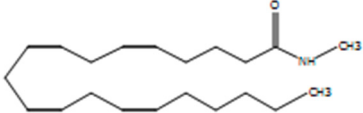                                 | 317.27 | 340.26 | *No reported biological activity                                                                    |
| 11 | <p><b>(2R,4R)-2-phenylthiazolidine-4-carboxylic acid</b><br/>Molecular formula: C<sub>10</sub>H<sub>11</sub>NO<sub>2</sub>S</p>  | 209.05 | 210.06 | *No reported biological activity                                                                    |
| 12 | <p><b>Ferimzone</b><br/>Molecular formula: C<sub>15</sub>H<sub>18</sub>N<sub>4</sub></p>                                         | 254.15 | 272.19 | *Antifungal activity [50].                                                                          |
| 13 | <p><b>Prosopinine</b><br/>Molecular formula: C<sub>16</sub>H<sub>33</sub>NO<sub>3</sub></p>                                    | 287.25 | 288.25 | *No reported biological activity                                                                    |
| 14 | <p><b>Cyclandelate</b><br/>Molecular formula: C<sub>17</sub>H<sub>24</sub>O<sub>3</sub></p>                                    | 276.17 | 277.18 | *A vasodilator agent [61,62].                                                                       |
| 15 | <p><b>3-Butylidene-7-hydroxyphthalide</b><br/>Molecular formula: C<sub>12</sub>H<sub>12</sub>O<sub>3</sub></p>                 | 204.08 | 205.09 | *Anti-inflammatory activity [63].<br>*Anticancer activity [64,65].<br>*Antibacterial activity [39]. |

**Supplementary Table S2: Molecules that remained unidentified from the conditioned media prepared from (A) HSG12 (*P. aeruginosa*) and (B) HSG16 (*B. subtilis*) isolated from gastrointestinal tract of *H. spinifer* through LC-MS.** The conditioned media was subjected to chloroform extraction and the extracts were subject to LC-MS analysis. The spectre generated were searched in the METLIN library in order to reveal the potential identity of the detected molecules.

| (A)                                              |                |                |                     |
|--------------------------------------------------|----------------|----------------|---------------------|
| HSG12 ( <i>P. aeruginosa</i> ) Conditioned Media |                |                |                     |
| Compound                                         | Retention Time | Molecular Mass | Molecular Formula   |
| 1                                                | 0.691          | 147.9731       |                     |
| 2                                                | 0.909          | 112.0167       | C5 H4 O3            |
| 3                                                | 11.877         | 443.0826       | C18 H17 N7 O3 S2    |
| 4                                                | 12.959         | 364.0925       | C17 H20 N2 O3 S2    |
| 5                                                | 13.809         | 459.0597       | C18 H25 N3 O S5     |
| 6                                                | 14.061         | 333.2529       | C18 H31 N5 O        |
| 7                                                | 15.153         | 380.0691       | C17 H20 N2 O2 S3    |
| 8                                                | 15.155         | 443.0656       | C18 H17 N7 O S3     |
| 9                                                | 15.203         | 476.3001       | C25 H40 N4 O5       |
| 10                                               | 15.302         | 298.1618       | C16 H26 O3 S        |
| 11                                               | 15.559         | 713.3832       | C32 H59 N O16       |
| 12                                               | 15.582         | 566.3428       | C27 H46 N6 O7       |
| 13                                               | 15.586         | 549.3532       | C28 H47 N5 O6       |
| 14                                               | 15.632         | 298.161        | C16 H26 O3 S        |
| 15                                               | 15.984         | 490.3148       | C26 H42 N4 O5       |
| 16                                               | 16.704         | 312.1777       | C17 H28 O3 S        |
| 17                                               | 16.797         | 1008.6586      |                     |
| 18                                               | 16.801         | 504.332        | C27 H44 N4 O5       |
| 19                                               | 16.801         | 1030.64        |                     |
| 20                                               | 16.804         | 567.3277       | C27 H45 N5 O8       |
| 21                                               | 17.007         | 354.2097       | C17 H30 N4 O2 S     |
| 22                                               | 17.214         | 678.4203       | C35 H58 N4 O9       |
| 23                                               | 17.323         | 326.1934       | C14 H30 O8          |
| 24                                               | 17.75          | 593.342        | C29 H47 N5 O8       |
| 25                                               | 17.752         | 530.3444       | C25 H42 N10 O3      |
| 26                                               | 17.943         | 530.2935       | C21 H34 N14 O3      |
| 27                                               | 18.476         | 532.3619       | C28 H52 O9          |
| 28                                               | 18.657         | 338.2149       | C10 H22 N14         |
| 29                                               | 19.151         | 382.2404       | C19 H34 N4 O2 S     |
| 30                                               | 0.673          | 185.0627       | C7 H11 N3 O S       |
| 31                                               | 0.753          | 122.0408       | C4 H10 O2 S         |
| 32                                               | 9.931          | 229.0874       | C11 H16 Cl N O2     |
| 33                                               | 10.564         | 231.1838       | C12 H25 N O3        |
| 34                                               | 12.335         | 259.2151       | C14 H29 N O3        |
| 35                                               | 12.964         | 364.0921       | C17 H20 N2 O3 S2    |
| 36                                               | 13.729         | 358.0219       | C14 H15 Cl N2 O3 S2 |
| 37                                               | 13.817         | 396.0644       | C17 H20 N2 O3 S3    |
| 38                                               | 15.162         | 380.0702       | C17 H20 N2 O2 S3    |
| 39                                               | 15.594         | 503.3461       | C26 H49 N O8        |
| 40                                               | 16.807         | 1030.6433      |                     |
| 41                                               | 16.809         | 504.3308       | C27 H44 N4 O5       |
| 42                                               | 17.756         | 547.3727       | C28 H53 N O9        |
| 43                                               | 18.479         | 532.3618       | C28 H52 O9          |
| 44                                               | 20.668         | 397.3508       | C23 H47 N3 S        |
| 45                                               | 20.981         | 267.1752       | C16 H26 Cl N        |
| 46                                               | 21.198         | 370.2973       | C24 H38 N2 O        |

(B)



| HSG16 ( <i>B. subtilis</i> ) conditioned media |                |                |                   |
|------------------------------------------------|----------------|----------------|-------------------|
| Compound                                       | Retention time | Molecular mass | Molecular formula |
| 1                                              | 0.739          | 196.8188       |                   |
| 2                                              | 11.902         | 266.0004       | C6 H6 N2 O10      |
| 3                                              | 15.356         | 298.1614       | C16 H26 O3 S      |
| 4                                              | 15.631         | 298.1614       | C16 H26 O3 S      |
| 5                                              | 0.636          | 119.9592       |                   |
| 6                                              | 1.943          | 143.0929       | C3 H9 N7          |
| 7                                              | 4.048          | 159.125        | C8 H17 N O2       |
| 8                                              | 8.467          | 452.3359       | C24 H44 N4 O4     |
| 9                                              | 12.342         | 157.1465       | C9 H19 N O        |
| 10                                             | 16.74          | 148.0155       | C8 H4 O3          |
| 11                                             | 17.3           | 340.2795       | C21 H40 O S       |
| 12                                             | 18.005         | 274.251        | C16 H34 O3        |
| 13                                             | 18.743         | 288.266        | C17 H36 O3        |
| 14                                             | 18.968         | 288.2668       | C17 H36 O3        |
| 15                                             | 19.593         | 302.281        | C18 H38 O3        |
| 16                                             | 19.85          | 302.2825       | C18 H38 O3        |
| 17                                             | 20.521         | 610.1548       | C39 H27 Cl O5     |
| 18                                             | 21.101         | 148.0157       | C8 H4 O3          |
| 19                                             | 21.104         | 497.2366       | C23 H35 N3 O9     |
| 20                                             | 21.336         | 701.207        | C44 H32 Cl N3 O4  |
| 21                                             | 22.381         | 775.2213       |                   |
| 22                                             | 22.562         | 609.174        | C36 H32 Cl N O4 S |
| 23                                             | 23.839         | 762.4992       |                   |

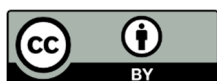

© 2020 by the authors. Submitted for possible open access publication under the terms and conditions of the Creative Commons Attribution (CC BY) license (<http://creativecommons.org/licenses/by/4.0/>).
